# Supplementary material
Source: publisher site journal article supplement (https://www.degruyterbrill.com/publication/isbn/9783035610062/downloadAsset/9783035610062_Look%20Inside.pdf)
Supplement: Supplementary file 1 [file 9783035610062_Look%20Inside.pdf]

PROJECT | Loft, apartment

## LOFT HAMBURG

HAMBURG | GERMANY

As with all renovations, the existing building services and structure had to be incorporated in the overall design. This was achieved through the use of a free-standing walnut unit which functions as the heart of the apartment. This unit incorporates the kitchen, bathroom and dresser, taking advantage of its proximity to the building services. Sections are cut out of the unit to allow natural light to penetrate deep into the loft. Flanking the walnut core are service walls

contrasted in white. These walls house the rest of the functional elements of the space, embedded within niches so that the remaining space can be used flexibly for working, relaxation, bathing and sleeping. Further flexibility is achieved through the use of ceiling-high, room-dividing sliding walls that allow the relationship of public and private space within the loft to be configured as needed. The sliding walls, when retracted, are completely concealed within the service walls.

124

Right | Living room

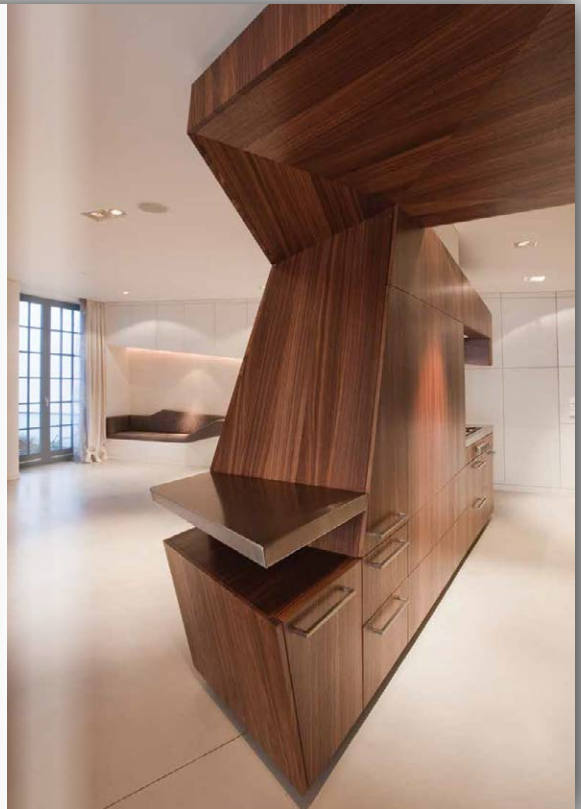

Top | Free-standing walnut unit with kitchen, bathroom and dresser

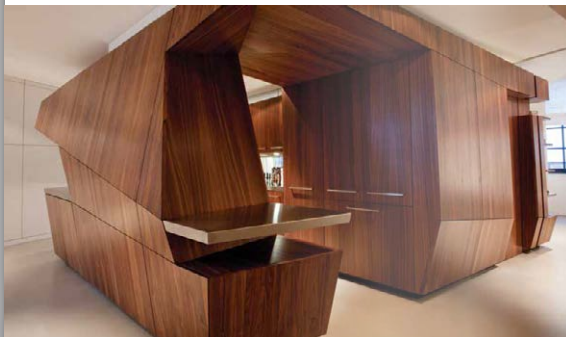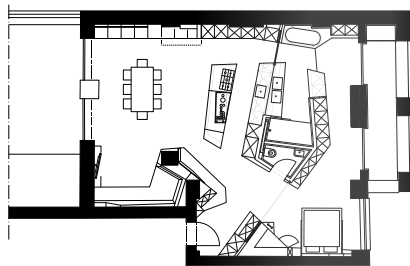

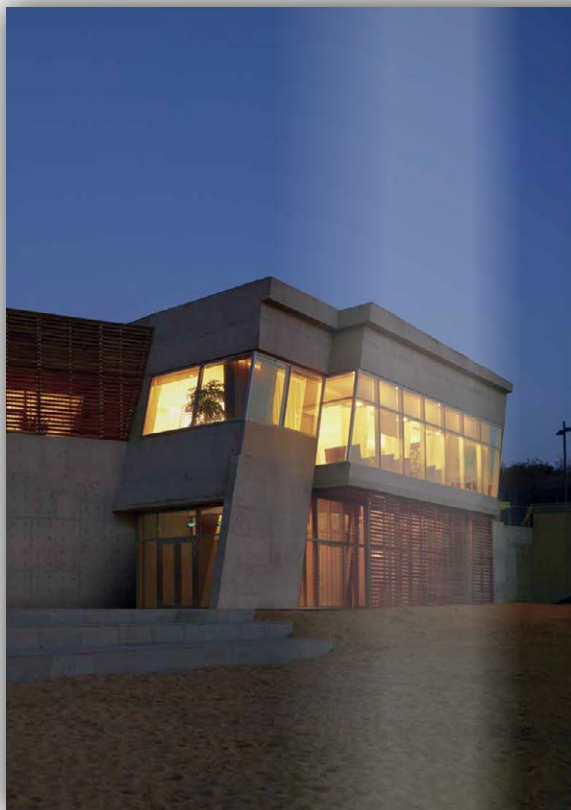

PROJECT | Urban planning, restaurants, retail space

## DALIAN AMBER BAY BEACH DALIAN | CHINA

Amber Bay lies on Binhai Road, Dalian's famous scenic coastal road on the Chinese city's southeast side. Just a fifteen-minute drive from the city centre, this picturesque stretch of coastline with its alluring beaches and towering rock formations offers an ideal place for dining and leisure away from noisy downtown Dalian. Within this unique setting, the Amber Bay Beachfront Development provides approximately 10,000 m<sup>2</sup> of restaurants and shopping facilities.

GRAFT's main design intent was to develop an architectural language which complements the natural setting of the sensitive beachfront area.

The design imagined a topographical landscape, that could be perceived as a natural configuration of publicly accessible platforms, stairs and roof terraces. The structure's materiality underlines this intention, reflecting the natural palette of the surroundings through its use of bleached wood and surface-treated concrete made of local aggregates.

A boardwalk serves as a public promenade along the half-moon of the beach, its wooden decking providing a natural transition between building and bay, softening the arced edge of the development as it blends into the sand.

419

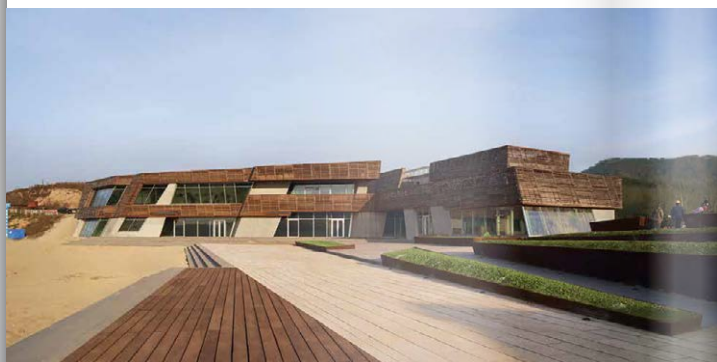

CLIENT | Dalian Amber Bay Development Co. Ltd.  
YEAR | 2007  
SIZE | 16,000 sqm  
STATUS | BUILT

422

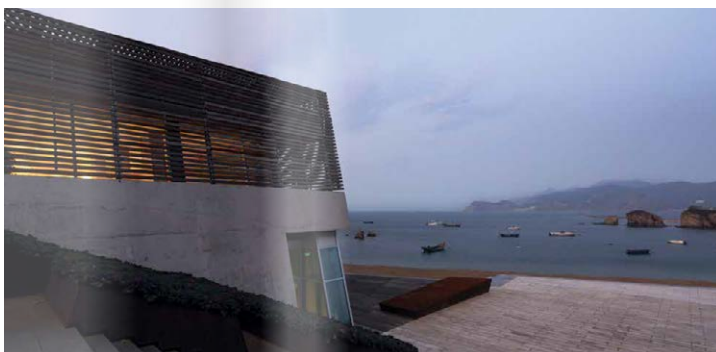

423
